# Supplementary material for: Bitter melon extract attenuating hepatic steatosis may be mediated by FGF21 and AMPK/Sirt1 signaling in mice
Source: PubMed Central journal article supplement (PMC3912441; doi:10.1038/srep03142), 2013-11-05
Supplement: srep03142-s4.pdf [file srep03142-s4.pdf]

Bitter melon extract attenuating hepatic steatosis may be mediated by FGF21 and AMPK/Sirt1 signaling in mice

Yongmei Yu<sup>1</sup>, Xian H Zhang<sup>1</sup>, Blake Ebersole<sup>2</sup>, David Ribnicky<sup>3</sup> and Zhong Q. Wang<sup>1\*</sup>

<sup>1</sup>Nutrition and Diabetes Research Laboratory, Pennington Biomedical Research Center, LSU System. Baton Rouge, LA 70808

<sup>2</sup>Verdure Sciences, 1250 Conner St, Noblesville, IN 46060

<sup>3</sup>Dept. of Plant Biology and Path., Rutgers University, New Brunswick, New Jersey 08901

\*Address for correspondence: Zhong Q Wang, M.D

SREP-13-03631A

| Momordicosides       | A     | F1    | G     | K     | L     | Total |
|----------------------|-------|-------|-------|-------|-------|-------|
| BM-V                 | 0.48% | 0.58% | 0.27% | 0.14% | 1.84% | 3.30% |
| (Verdure MCA015EPPH) |       |       |       |       |       |       |

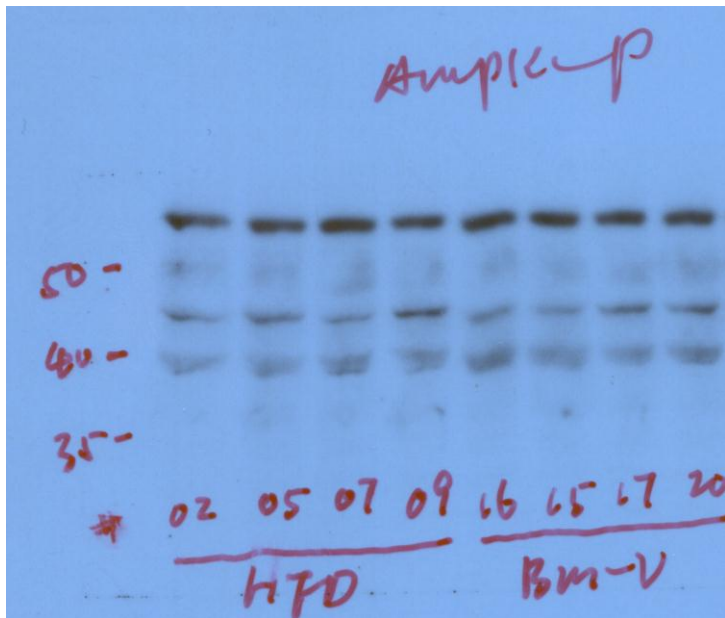

AMPK p

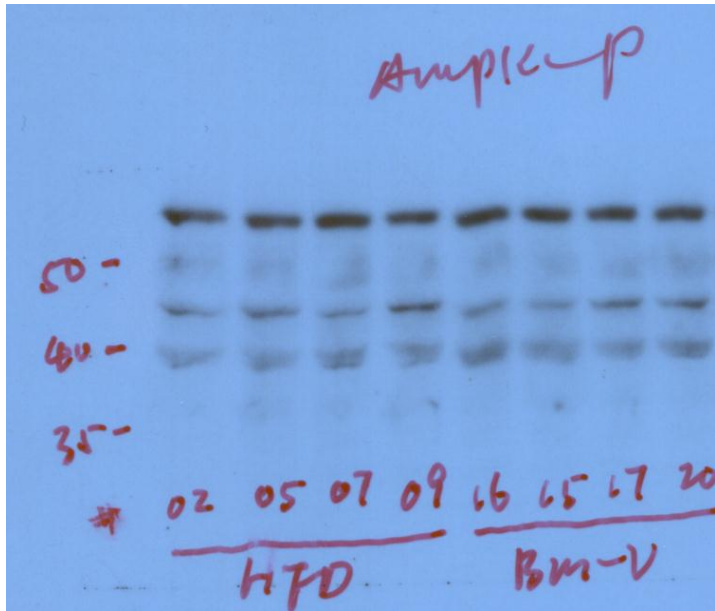

AMPK $\alpha$ 1

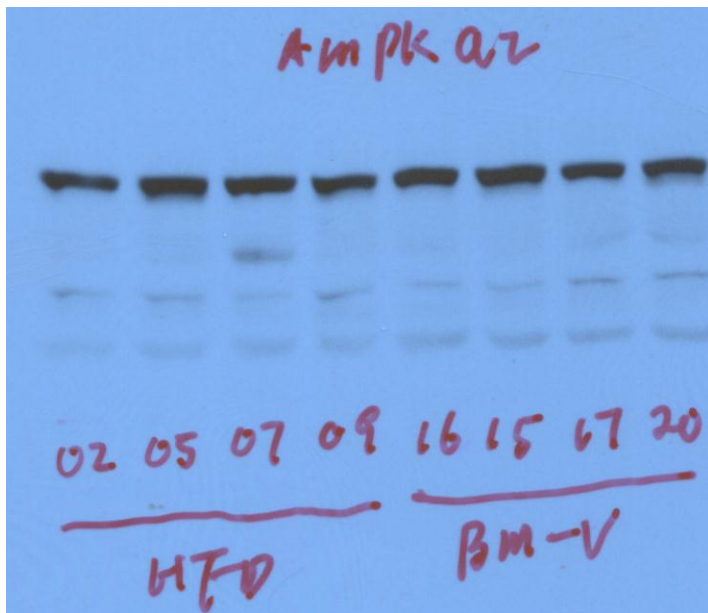

AMPK $\alpha$ 2



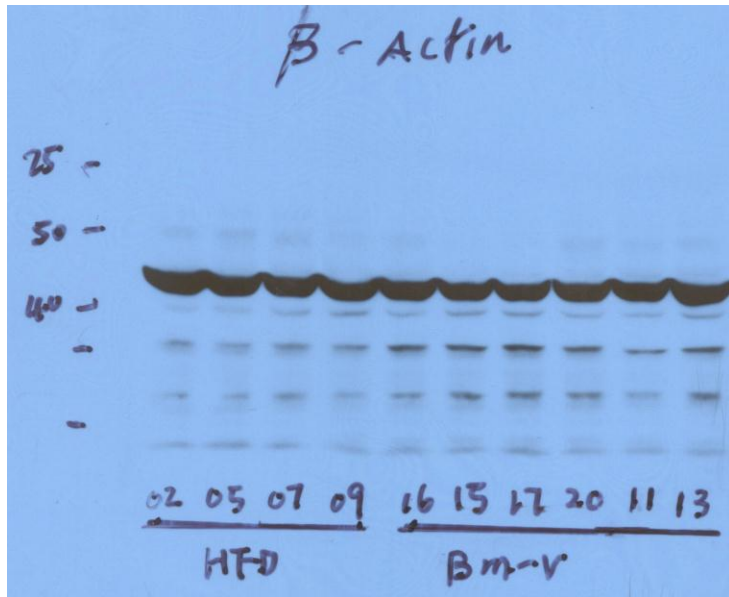

#### B-Actin2

Figure 3. The effects of BM extracts on fasting plasma and liver FGF21 levels as well as FGF21 signaling in mice. FGF21 was measured using a mouse FGF21 ELISA kit from R & D Systems Inc (Minneapolis, MN). (A) Fasting plasma FGF21 concentrations. (B) Liver FGF21 content. Mean  $\pm$  SEM (n=10/group). (C) FGF21 signaling proteins were measured by Western blotting assay. Results were normalized by  $\beta$ -actin content. BM-V significantly increased FGFR1, FGFR3, FGFR4 and PGC-1 $\alpha$ , slightly reduced PPAR $\alpha$ , but did not affect b-Klotho protein abundance in comparison with HFD animals. Mean  $\pm$  SEM (n=10/group). \* P < 0.05, \*\* P<0.01, and \*\*\* P <0.001, BM-V group vs. HFD group. # P<0.05, glucose concentrations at week 6 or week 12 vs. week 0 in HFD animals.
